# Supplementary material for: The Impacts of Flowering Time and Tillering on Grain Yield of Sorghum Hybrids across Diverse Environments
Source: Preprints.org preprint supplement (doi:10.20944/preprints201909.0198.v1), 2019-09-18
Supplement: Supplementary file 2 [file Supplementary Table S1-S5.xlsx]

## Sheet: Table S1
Table S1 Details of the 21 trials and the number of hybrid combinations for each female tester in the 2015-17 summer growing seasons
Trial	Season	Location	Type	Region	Sowing date	GPS coordinates	Altitude (m asl)	Plot no.	No. of Genotypes	Percentage of genotypes replicated	No. of hybrid in combination with			No. of unique test gentoypes
											B010054	B963676	B986604
AYTM15DAL	2015	Dalby Box	AYTMales	SQ	2014-10-16	Lat. -27.378 Long. 151.226	345	766	577	31.7158	213	295	58	566
AYTM15GAT	2015	Gatton	AYTMales	SQ	2014-10-20	Lat. -27.549 Long. 152.326	90	597	445	33.2584	176	230	31	437
AYTM15SPR	2015	Spring Ridge	AYTMales	NNSW	2014-10-28	Lat. -31.362 Long. 150.232	310	775	580	32.7586	222	292	55	569
PYTM15WAR	2015	Warwick	PYTMales	SQ	2014-12-03	Lat. -28.214 Long. 152.105	465.1	784	584	33.0479	3	571	2	576
AYTM15WAR	2015	Warwick	AYTMales	SQ	2014-12-03	Lat. -28.214 Long. 152.105	465.1	766	582	30.9278	217	296	59	572
AYTM15JIM	2015	Jimbour	AYTMales	SQ	2014-12-17	Lat. -27.029 Long. 151.198	347	781	575	34.9565	214	296	55	565
AYTM15CAP	2015	Capella	AYTMales	CQ	2015-01-11	Lat. -23.222 Long. 148.114	235	776	590	29.1525	216	303	58	577
AYTM15EME	2015	Emerald	AYTMales	CQ	2015-01-12	Lat. -23.529 Long. 148.213	161	798	611	28.4779	228	309	61	598
AYTM16CRO	2016	Croppa Creek	AYTMales	NNSW	2015-09-23	Lat. -29.046 Long. 150.332	277	960	710	26.6197	-	397	293	690
AYTM16DAL	2016	Dalby Box	AYTMales	SQ	2015-10-20	Lat. -27.374 Long. 151.226	361	1120	852	24.6479	-	428	403	831
AYTM16SPR	2016	Spring Ridge	AYTMales	NNSW	2015-11-10	Lat. -31.390 Long. 150.223	315	1200	891	27.9461	-	438	432	870
AYTM16BLA	2016	Blackville	AYTMales	NNSW	2015-11-10	Lat. -31.596 Long. 150.296	343	960	731	23.2558	-	408	302	710
AYTM16PIR	2016	Pirrinuan	AYTMales	SQ	2015-11-17	Lat. -27.096 Long. 151.222	356.4	1160	878	25.3986	-	428	429	857
AYTM16JAN	2016	Jandowae	AYTMales	SQ	2015-12-08	Lat. -26.891 Long. 151.127	343	1000	748	26.0695	-	416	311	727
AYTM16WAR	2016	Warwick	AYTMales	SQ	2015-12-21	Lat. -28.211 Long. 152.104	459	1224	925	26.1622	-	457	447	904
AYTM16ORI	2016	Orion	AYTMales	CQ	2016-02-15	Lat. -24.231 Long. 148.411	234	960	706	27.9037	-	393	289	682
AYTM16EME	2016	Emerald	AYTMales	CQ	2016-02-16	Lat. -23.529 Long. 148.213	161	1120	835	27.3054	-	418	393	811
AYTM17MAC	2017	Macalister	AYTMales	SQ	2016-10-11	Lat -27.028 Long. 151.093	352.94	750	523	27.7247	-	264	233	497
AYTM17CAR	2017	Caroona	AYTMales	NNSW	2016-11-02	Lat. -31.303 Long. 150.382	310.52	800	556	29.4964	-	284	245	529
AYTM17BLA	2017	Pine Ridge	AYTMales	NNSW	2016-11-08	Lat -31.483 Long. 150.450	325	800	538	33.4572	-	275	237	512
AYTM17EME	2017	Emerald	AYTMales	CQ	2017-03-07	Lat. -23.529 Long. 148.213	161	669	471	22.7176	-	241	202	443

## Sheet: Table S2
Table S2 Between trial genetic correlations of grain yield adjusted for establishment.
Trial	PYTM15WAR	AYTM15CAP	AYTM15DAL	AYTM15EME	AYTM15GAT	AYTM15WAR	AYTM15JIM	AYTM15SPR	AYTM16BLA	AYTM16CRO	AYTM16DAL	AYTM16EME	AYTM16WAR	AYTM16JAN	AYTM16ORI	AYTM16PIR	AYTM16SPR	AYTM17PIN	AYTM17EME	AYTM17MAC	AYTM17CAR
PYTM15WAR	1	-0.25	0.18	0.16	0.38	0.62	0.52	0.16	-0.05	0.07	0.21	0.2	0.34	0.19	0.26	0.07	0.02	-0.57	-0.24	-0.71	0.59
AYTM15CAP	-0.25	1	0.01	0.18	0.11	0.07	0.11	0.13	0.19	0.33	-0.05	-0.15	-0.12	0.04	0.16	0.02	-0.05	0.02	0.1	0	0
AYTM15DAL	0.18	0.01	1	0.12	0.29	0.28	0.22	0.17	0.18	0.08	0.08	-0.19	0.12	0.05	0.06	0.09	0.17	0.02	0.01	-0.02	-0.15
AYTM15EME	0.16	0.18	0.12	1	0.2	0.38	0.36	0.06	-0.11	0.09	0.03	0.15	-0.05	0.08	0.19	0.03	0.01	0.08	0.18	0.16	0.01
AYTM15GAT	0.38	0.11	0.29	0.2	1	0.45	0.23	0.17	-0.07	0.22	0.17	-0.18	0.29	0.14	-0.07	0.07	-0.03	-0.14	0.15	0.04	0.1
AYTM15WAR	0.62	0.07	0.28	0.38	0.45	1	0.42	0.13	-0.09	-0.01	0.19	0.08	0.22	0.06	-0.08	0.12	-0.05	-0.28	0.14	-0.19	0.03
AYTM15JIM	0.52	0.11	0.22	0.36	0.23	0.42	1	0.18	0.04	-0.02	0.15	0.15	-0.01	0.06	0.13	0.09	-0.04	0.01	-0.2	-0.07	0.17
AYTM15SPR	0.16	0.13	0.17	0.06	0.17	0.13	0.18	1	0.12	0.08	0.3	-0.2	-0.06	0.12	-0.07	0.15	0.15	0.13	-0.02	0.06	0.04
AYTM16BLA	-0.05	0.19	0.18	-0.11	-0.07	-0.09	0.04	0.12	1	0.16	0.13	-0.09	0.03	0.12	0.14	0.21	0.33	0.21	0.09	0.2	-0.01
AYTM16CRO	0.07	0.33	0.08	0.09	0.22	-0.01	-0.02	0.08	0.16	1	-0.06	0.07	-0.02	0.08	0.19	0.05	0.2	0.07	0.11	0.08	-0.09
AYTM16DAL	0.21	-0.05	0.08	0.03	0.17	0.19	0.15	0.3	0.13	-0.06	1	0.01	0.16	0.07	-0.02	0.16	0.12	-0.06	0.02	-0.01	0.31
AYTM16EME	0.2	-0.15	-0.19	0.15	-0.18	0.08	0.15	-0.2	-0.09	0.07	0.01	1	0	-0.01	0.27	-0.03	-0.09	-0.04	-0.06	-0.29	-0.04
AYTM16WAR	0.34	-0.12	0.12	-0.05	0.29	0.22	-0.01	-0.06	0.03	-0.02	0.16	0	1	0.29	-0.09	0.2	0	-0.14	0.1	-0.07	-0.13
AYTM16JAN	0.19	0.04	0.05	0.08	0.14	0.06	0.06	0.12	0.12	0.08	0.07	-0.01	0.29	1	0.09	0.19	0.07	-0.1	0.12	0.11	0
AYTM16ORI	0.26	0.16	0.06	0.19	-0.07	-0.08	0.13	-0.07	0.14	0.19	-0.02	0.27	-0.09	0.09	1	0.1	0.14	0.24	-0.02	0.04	-0.05
AYTM16PIR	0.07	0.02	0.09	0.03	0.07	0.12	0.09	0.15	0.21	0.05	0.16	-0.03	0.2	0.19	0.1	1	0.18	-0.03	0.12	0.06	-0.05
AYTM16SPR	0.02	-0.05	0.17	0.01	-0.03	-0.05	-0.04	0.15	0.33	0.2	0.12	-0.09	0	0.07	0.14	0.18	1	0.36	-0.15	0.3	0.02
AYTM17PIN	-0.57	0.02	0.02	0.08	-0.14	-0.28	0.01	0.13	0.21	0.07	-0.06	-0.04	-0.14	-0.1	0.24	-0.03	0.36	1	0	0.33	0.3
AYTM17EME	-0.24	0.1	0.01	0.18	0.15	0.14	-0.2	-0.02	0.09	0.11	0.02	-0.06	0.1	0.12	-0.02	0.12	-0.15	0	1	0.07	0.08
AYTM17MAC	-0.71	0	-0.02	0.16	0.04	-0.19	-0.07	0.06	0.2	0.08	-0.01	-0.29	-0.07	0.11	0.04	0.06	0.3	0.33	0.07	1	0.36
AYTM17CAR	0.59	0	-0.15	0.01	0.1	0.03	0.17	0.04	-0.01	-0.09	0.31	-0.04	-0.13	0	-0.05	-0.05	0.02	0.3	0.08	0.36	1

## Sheet: Table S3
Table S3 Correlation of overall BLUPs for flowering time (DTF) and fertile tiller number per plant (FTN) for hybrids in combination with the three female testers. Overall BLUPs for DTF and FTN were predicted from the MET analysis of the 17 and 11 trials that had DTF and FTN collected respectively.
Trial	B010054		B963676		B986604
	Correlation coefficient	p value	Correlation coefficient	p value	Correlation coefficient	p value
AYTM15DAL	-0.0273437	0.641119	-0.0975728	0.0587286	-0.0595643	0.616667
AYTM15GAT	-0.0368312	0.578404	-0.0753143	0.185979	-0.15936	0.346132
AYTM15SPR	-0.0154773	0.791227	-0.0824923	0.105162	-0.0086953	0.943469
AYTM15WAR	-0.0299267	0.613636	-0.0880444	0.0857034	-0.0508772	0.664659
PYTM15WAR	-a	-a	-0.114266	0.00171009	-a	-a
AYTM15JIM	-0.0201367	0.730084	-0.057381	0.25889	-0.0858987	0.469933
AYTM15CAP	-0.0242372	0.687424	-0.122829	0.0163096	0.0284409	0.803508
AYTM15EME	-0.0109128	0.853197	-0.109347	0.0310691	0.0480413	0.666258
AYTM16CRO	-b	-b	-0.00639082	0.885746	-0.0649829	0.220649
AYTM16DAL	-b	-b	-0.0205627	0.65248	-0.01162	0.786846
AYTM16SPR	-b	-b	-0.0458201	0.289198	0.000911456	0.982723
AYTM16BLA	-b	-b	0.0192154	0.665693	-0.0686643	0.194915
AYTM16PIR	-b	-b	-0.0688527	0.118625	-0.02473	0.562765
AYTM16JAN	-b	-b	-0.125591	0.0148156	-0.0270941	0.533295
AYTM16WAR	-b	-b	-0.0407793	0.346041	-0.000432756	0.991595
AYTM16ORI	-b	-b	-0.0519111	0.327368	0.00621925	0.889012
AYTM16EME	-b	-b	-0.0725736	0.113051	-0.0255826	0.550836
AYTM17MAC	-b	-b	-0.0435866	0.425132	-0.0459109	0.432094
AYTM17CAR	-b	-b	-0.0102227	0.844003	-0.0193712	0.734484
AYTM17PIN	-b	-b	-0.0472929	0.356623	-0.0236164	0.683716
AYTM17EME	-b	-b	-0.0144896	0.825133	-0.0182377	0.753472
adata not presented due to limited sample size (3 and 2 hybrids derived from B010054 and B986604 respectively)
bB010054 hybrids were only grown in the 2015 season

## Sheet: Table S4
Table S4 Between trial genetic correlations of grain yield after accounting for the effect of flowering time (DTF).
Trial	PYTM15WAR	AYTM15CAP	AYTM15DAL	AYTM15EME	AYTM15GAT	AYTM15WAR	AYTM15JIM	AYTM15SPR	AYTM16BLA	AYTM16CRO	AYTM16DAL	AYTM16EME	AYTM16WAR	AYTM16JAN	AYTM16ORI	AYTM16PIR	AYTM16SPR	AYTM17PIN	AYTM17EME	AYTM17MAC	AYTM17CAR
PYTM15WAR	1	-0.455149	0.0977278	-0.470879	-0.0477479	-0.0697895	0.353841	0.0438901	0.0272976	0.0943585	0.250867	0.15876	0.265388	0.161644	0.226494	0.0438251	0.0593589	-0.59854	0.581294	-0.820509	0.581294
AYTM15CAP	-0.455149	1	-0.0115043	0.1792	0.112399	0.0580276	0.108458	0.129029	0.135	0.308373	-0.0244324	-0.146268	-0.0935886	0.0534386	0.115207	0.0101483	-0.152907	-0.0728126	0.00813122	-0.0616225	0.00813122
AYTM15DAL	0.0977278	-0.0115043	1	0.0189485	0.146548	0.107693	0.139664	0.176433	0.160262	0.0648851	0.158521	-0.0954342	0.112642	0.0483876	0.202419	0.0591258	0.1769	0.217052	-0.0846847	-0.00512265	-0.0846847
AYTM15EME	-0.470879	0.1792	0.0189485	1	0.0186399	0.133853	0.248426	0.050597	-0.129671	0.127513	0.0602071	0.100704	-0.0008345	0.0886628	0.102393	0.0463975	-0.0258622	-0.0218097	-0.0190588	0.172227	-0.0190588
AYTM15GAT	-0.0477479	0.112399	0.146548	0.0186399	1	0.20187	0.11455	0.165756	-0.0676507	0.308725	0.247331	-0.114222	0.227294	0.0882516	0.0311498	0.042023	0.00889774	0.0262167	0.212046	0.156007	0.212046
AYTM15WAR	-0.0697895	0.0580276	0.107693	0.133853	0.20187	1	0.263719	0.109097	0.0153271	0.113786	0.133631	-0.00237263	0.22459	0.032351	-0.0321475	0.16898	0.0686125	-0.0519018	0.0653878	0.0673803	0.0653878
AYTM15JIM	0.353841	0.108458	0.139664	0.248426	0.11455	0.263719	1	0.165769	0.0239627	-0.0133507	0.155279	0.0544643	0.0642717	0.0808346	-0.0222216	0.137082	-0.0996398	-0.0191495	0.181474	-0.118668	0.181474
AYTM15SPR	0.0438901	0.129029	0.176433	0.050597	0.165756	0.109097	0.165769	1	0.138275	0.0824451	0.227375	-0.218573	-0.0146211	0.145201	-0.041866	0.184397	0.150093	0.0751149	-0.0484146	0.00102336	-0.0484146
AYTM16BLA	0.0272976	0.135	0.160262	-0.129671	-0.0676507	0.0153271	0.0239627	0.138275	1	0.0973016	0.169758	-0.0834576	0.0752436	0.151156	0.1096	0.184489	0.279804	0.111005	0.0321345	0.108043	0.0321345
AYTM16CRO	0.0943585	0.308373	0.0648851	0.127513	0.308725	0.113786	-0.0133507	0.0824451	0.0973016	1	-0.0498995	0.0845498	0.0237466	0.112431	0.161959	0.0170497	0.104645	-0.0526036	-0.0421371	-0.0676147	-0.0421371
AYTM16DAL	0.250867	-0.0244324	0.158521	0.0602071	0.247331	0.133631	0.155279	0.227375	0.169758	-0.0498995	1	0.00961752	0.157511	0.120273	0.0567066	0.184817	0.162418	-0.0395279	0.274974	0.0339981	0.274974
AYTM16EME	0.15876	-0.146268	-0.0954342	0.100704	-0.114222	-0.00237263	0.0544643	-0.218573	-0.0834576	0.0845498	0.00961752	1	0.0602813	0.00674586	0.17888	-0.000897526	-0.0572954	-0.105636	-0.0790145	-0.24316	-0.0790145
AYTM16WAR	0.265388	-0.0935886	0.112642	-0.0008345	0.227294	0.22459	0.0642717	-0.0146211	0.0752436	0.0237466	0.157511	0.0602813	1	0.298234	-0.000942482	0.189788	0.0147448	-0.032255	-0.1075	-0.0152055	-0.1075
AYTM16JAN	0.161644	0.0534386	0.0483876	0.0886628	0.0882516	0.032351	0.0808346	0.145201	0.151156	0.112431	0.120273	0.00674586	0.298234	1	0.126995	0.204009	0.103597	-0.0320112	0.0255966	0.132297	0.0255966
AYTM16ORI	0.226494	0.115207	0.202419	0.102393	0.0311498	-0.0321475	-0.0222216	-0.041866	0.1096	0.161959	0.0567066	0.17888	-0.000942482	0.126995	1	0.127113	0.121309	0.140578	0.00777303	0.0505869	0.00777303
AYTM16PIR	0.0438251	0.0101483	0.0591258	0.0463975	0.042023	0.16898	0.137082	0.184397	0.184489	0.0170497	0.184817	-0.000897526	0.189788	0.204009	0.127113	1	0.150638	0.00272812	-0.0152189	0.0271637	-0.0152189
AYTM16SPR	0.0593589	-0.152907	0.1769	-0.0258622	0.00889774	0.0686125	-0.0996398	0.150093	0.279804	0.104645	0.162418	-0.0572954	0.0147448	0.103597	0.121309	0.150638	1	0.240095	0.0649096	0.16631	0.0649096
AYTM17PIN	-0.59854	-0.0728126	0.217052	-0.0218097	0.0262167	-0.0519018	-0.0191495	0.0751149	0.111005	-0.0526036	-0.0395279	-0.105636	-0.032255	-0.0320112	0.140578	0.00272812	0.240095	1	0.333759	0.326164	0.333759
AYTM17EME	0.581294	0.00813122	-0.0846847	-0.0190588	0.212046	0.0653878	0.181474	-0.0484146	0.0321345	-0.0421371	0.274974	-0.0790145	-0.1075	0.0255966	0.00777303	-0.0152189	0.0649096	0.333759	1	0.416612	1
AYTM17MAC	-0.820509	-0.0616225	-0.00512265	0.172227	0.156007	0.0673803	-0.118668	0.00102336	0.108043	-0.0676147	0.0339981	-0.24316	-0.0152055	0.132297	0.0505869	0.0271637	0.16631	0.326164	0.416612	1	0.416612
AYTM17CAR	0.581294	0.00813122	-0.0846847	-0.0190588	0.212046	0.0653878	0.181474	-0.0484146	0.0321345	-0.0421371	0.274974	-0.0790145	-0.1075	0.0255966	0.00777303	-0.0152189	0.0649096	0.333759	1	0.416612	1

## Sheet: Table S5
Table S5 Between trial genetic correlations of grain yield after accounting for the effect of fertile tiller number per plant (FTN).
Trial	PYTM15WAR	AYTM15CAP	AYTM15DAL	AYTM15EME	AYTM15GAT	AYTM15WAR	AYTM15JIM	AYTM15SPR	AYTM16BLA	AYTM16CRO	AYTM16DAL	AYTM16EME	AYTM16WAR	AYTM16JAN	AYTM16ORI	AYTM16PIR	AYTM16SPR	AYTM17PIN	AYTM17EME	AYTM17MAC	AYTM17CAR
PYTM15WAR	1	-0.529141	0.333469	-0.169968	-0.120855	-0.0806191	0.383284	0.0113856	-0.000485102	0.0531948	0.218483	0.159735	0.299419	0.168209	0.212464	0.0657669	0.0322822	-0.601524	0.560143	-0.790904	-0.601524
AYTM15CAP	-0.529141	1	-0.0065558	0.189658	0.122013	0.0702884	0.119548	0.117428	0.126323	0.31424	-0.0294437	-0.149916	-0.0800081	0.0402832	0.140022	0.0437917	-0.179207	-0.086273	-0.0101844	-0.0701508	-0.086273
AYTM15DAL	0.333469	-0.0065558	1	0.0342973	0.183104	0.126649	0.154645	0.161649	0.183705	0.0547707	0.0924234	-0.106954	0.133524	0.0593877	0.225435	0.0583996	0.190263	0.171039	-0.138283	-0.00455676	0.171039
AYTM15EME	-0.169968	0.189658	0.0342973	1	0.0433064	0.14202	0.259425	0.0502422	-0.0999719	0.151176	0.0443223	0.0768106	0.0041002	0.0836601	0.106908	0.0729791	0.00342498	-0.0275818	-0.014722	0.158348	-0.0275818
AYTM15GAT	-0.120855	0.122013	0.183104	0.0433064	1	0.216572	0.128857	0.162217	-0.0279816	0.3219	0.108416	-0.137778	0.287228	0.11944	0.0756298	0.0604236	0.0469259	-0.0176968	0.093488	0.116175	-0.0176968
AYTM15WAR	-0.0806191	0.0702884	0.126649	0.14202	0.216572	1	0.276067	0.10104	0.0161091	0.117968	0.175171	0.0195385	0.204375	0.0150612	-0.0393097	0.155268	0.0733456	-0.0398091	0.0621318	0.0242271	-0.0398091
AYTM15JIM	0.383284	0.119548	0.154645	0.259425	0.128857	0.276067	1	0.154885	0.0370081	0.00648896	0.165868	0.0641885	0.0376624	0.074754	-0.0265428	0.127941	-0.110715	-0.00355775	0.173636	-0.134443	-0.00355775
AYTM15SPR	0.0113856	0.117428	0.161649	0.0502422	0.162217	0.10104	0.154885	1	0.0912974	0.0545848	0.304703	-0.187053	-0.0408604	0.123935	-0.0979389	0.137109	0.133137	0.0707976	0.00101882	-0.0294489	0.0707976
AYTM16BLA	-0.000485102	0.126323	0.183705	-0.0999719	-0.0279816	0.0161091	0.0370081	0.0912974	1	0.0658541	0.148848	-0.0942643	0.100983	0.162453	0.111642	0.199641	0.263339	0.0675242	-0.0148575	0.0911694	0.0675242
AYTM16CRO	0.0531948	0.31424	0.0547707	0.151176	0.3219	0.117968	0.00648896	0.0545848	0.0658541	1	-0.0614858	0.0743269	0.0451774	0.127332	0.159032	0.0336381	0.077068	-0.107792	-0.0726189	-0.0944322	-0.107792
AYTM16DAL	0.218483	-0.0294437	0.0924234	0.0443223	0.108416	0.175171	0.165868	0.304703	0.148848	-0.0614858	1	0.0453811	0.132683	0.0702467	0.0191318	0.144181	0.136637	0.00239409	0.318276	0.0532722	0.00239409
AYTM16EME	0.159735	-0.149916	-0.106954	0.0768106	-0.137778	0.0195385	0.0641885	-0.187053	-0.0942643	0.0743269	0.0453811	1	0.0514638	-0.0023207	0.161259	-0.00781128	-0.0633988	-0.0820949	-0.0393281	-0.24339	-0.0820949
AYTM16WAR	0.299419	-0.0800081	0.133524	0.0041002	0.287228	0.204375	0.0376624	-0.0408604	0.100983	0.0451774	0.132683	0.0514638	1	0.298708	0.0148427	0.197302	0.0344302	-0.0268996	-0.136227	0.00646312	-0.0268996
AYTM16JAN	0.168209	0.0402832	0.0593877	0.0836601	0.11944	0.0150612	0.074754	0.123935	0.162453	0.127332	0.0702467	-0.0023207	0.298708	1	0.143481	0.209582	0.112859	-0.0767235	-0.015043	0.142772	-0.0767235
AYTM16ORI	0.212464	0.140022	0.225435	0.106908	0.0756298	-0.0393097	-0.0265428	-0.0979389	0.111642	0.159032	0.0191318	0.161259	0.0148427	0.143481	1	0.13448	0.120759	0.120511	-0.0243175	0.068976	0.120511
AYTM16PIR	0.0657669	0.0437917	0.0583996	0.0729791	0.0604236	0.155268	0.127941	0.137109	0.199641	0.0336381	0.144181	-0.00781128	0.197302	0.209582	0.13448	1	0.16242	-0.0151671	-0.0567577	0.0347	-0.0151671
AYTM16SPR	0.0322822	-0.179207	0.190263	0.00342498	0.0469259	0.0733456	-0.110715	0.133137	0.263339	0.077068	0.136637	-0.0633988	0.0344302	0.112859	0.120759	0.16242	1	0.219583	0.0388225	0.119294	0.219583
AYTM17PIN	-0.601524	-0.086273	0.171039	-0.0275818	-0.0176968	-0.0398091	-0.00355775	0.0707976	0.0675242	-0.107792	0.00239409	-0.0820949	-0.0268996	-0.0767235	0.120511	-0.0151671	0.219583	1	0.358147	0.304758	1
AYTM17EME	0.560143	-0.0101844	-0.138283	-0.014722	0.093488	0.0621318	0.173636	0.00101882	-0.0148575	-0.0726189	0.318276	-0.0393281	-0.136227	-0.015043	-0.0243175	-0.0567577	0.0388225	0.358147	1	0.402135	0.358147
AYTM17MAC	-0.790904	-0.0701508	-0.00455676	0.158348	0.116175	0.0242271	-0.134443	-0.0294489	0.0911694	-0.0944322	0.0532722	-0.24339	0.00646312	0.142772	0.068976	0.0347	0.119294	0.304758	0.402135	1	0.304758
AYTM17CAR	-0.601524	-0.086273	0.171039	-0.0275818	-0.0176968	-0.0398091	-0.00355775	0.0707976	0.0675242	-0.107792	0.00239409	-0.0820949	-0.0268996	-0.0767235	0.120511	-0.0151671	0.219583	1	0.358147	0.304758	1
